# Supplementary material for: Identification of parameter importance for benzene transport in the unsaturated zone using global sensitivity analysis
Source: Copernicus journal article supplement (doi:10.5194/hess-28-1585-2024), 2024-04-09
Supplement: Supplementary file 1 [file hess-28-1585-2024-supplement.pdf]

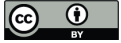

*Supplement of*

## **Identification of parameter importance for benzene transport in the unsaturated zone using global sensitivity analysis**

**Meirav Cohen et al.**

*Correspondence to:* Meirav Cohen (meirav@adssc.org)

The copyright of individual parts of the supplement might differ from the article licence.

### S1. Literature values for first order biodegradation rate constant (day<sup>-1</sup>)

Table S1 – Literature values for benzene first order biodegradation rate constant (day<sup>-1</sup>)

| First order Biodegradation Rate Constant (day <sup>-1</sup> ) | Benzene conc. (mg/l)                                          | Saturation level WC (%)   | Calculation form                | Comments                                 | Reference               |
|---------------------------------------------------------------|---------------------------------------------------------------|---------------------------|---------------------------------|------------------------------------------|-------------------------|
| 174*                                                          | 0.000104                                                      | Unsaturated zone 5-10% WC | Calculated and model-calibrated | Field data - upward flux from NAPL       | Lahvis et al., (1999)   |
| 4.01                                                          | 0.00443                                                       |                           |                                 |                                          |                         |
| 1.48                                                          | 0.0197                                                        |                           |                                 |                                          |                         |
| 0.066                                                         | 0.231                                                         | Capillary zone 12-36% WC  |                                 |                                          |                         |
| 0.31                                                          | 0.231                                                         |                           |                                 |                                          |                         |
| 0.48                                                          | 360-850                                                       | Unsaturated zone 3% WC    | Calculated and model-calibrated | Column experiments upward flux from NAPL | DeVaull et al., (1997)  |
| 0.144                                                         | 1550                                                          | 18% WC                    |                                 |                                          |                         |
| 6.48                                                          |                                                               |                           | Calculated and model-calibrated | Summary of measured data                 |                         |
| 28.8                                                          | ~0.005-2                                                      | Unsaturated               | Calculated and model-calibrated | Field data - upward flux from NAPL       | Hers et al., (2000)     |
| 9.6                                                           |                                                               | Unsaturated               |                                 | Field data                               | Ririe & Sweeney, (1995) |
| 0.035                                                         | 1770                                                          | Unsaturated               | Modeled                         | Lower modeled value                      | Berlin et al., (2016)   |
| 0.05                                                          |                                                               |                           |                                 | Upper modeled value                      |                         |
| <b>0.98</b>                                                   | <b>Overall median value</b>                                   |                           |                                 |                                          |                         |
| <b>0.48</b>                                                   | <b>Overall median value excluding the highest value (174)</b> |                           |                                 |                                          |                         |

## S2. Literature values for benzene sorption coefficient

Table S2 - Literature values of benzene sorption constant

| K <sub>ow</sub><br>Octanol-<br>water<br>partition<br>coefficient<br>(log (m <sup>3</sup> /kg)) | K <sub>oc</sub><br>Organic-<br>carbon<br>partition<br>coefficient<br>(log m <sup>3</sup> /kg) | K <sub>ow</sub><br>Octanol-<br>water<br>partition<br>coefficient<br>(m <sup>3</sup> /kg) | K <sub>oc</sub><br>Organic-<br>carbon<br>partition<br>coefficient<br>(m <sup>3</sup> /kg) | Freundlich sorption<br>coefficients |                                                                           | Fraction<br>organic<br>carbon<br>(f <sub>oc</sub> ) | <b>K<sub>d</sub> Soil<br/>Sorption<br/>coefficient<br/>(m<sup>3</sup>/kg)<br/>(K<sub>d</sub>=f<sub>oc</sub>K<sub>oc</sub>)</b> | Water<br>content | Soil type                                         | Comments                           | Reference                    |
|------------------------------------------------------------------------------------------------|-----------------------------------------------------------------------------------------------|------------------------------------------------------------------------------------------|-------------------------------------------------------------------------------------------|-------------------------------------|---------------------------------------------------------------------------|-----------------------------------------------------|--------------------------------------------------------------------------------------------------------------------------------|------------------|---------------------------------------------------|------------------------------------|------------------------------|
|                                                                                                |                                                                                               |                                                                                          |                                                                                           | 1/n <sub>f</sub>                    | K <sub>f</sub> (kg/kg)<br>(kg/m <sup>3</sup> ) <sup>1/n<sub>f</sub></sup> |                                                     |                                                                                                                                |                  |                                                   |                                    |                              |
| -                                                                                              | 1.72E-03                                                                                      | -                                                                                        | 5.25E-02                                                                                  |                                     |                                                                           | 0.05*                                               | <b>2.62E-03</b>                                                                                                                | -                | -                                                 | Calculated<br>from K <sub>ow</sub> | Karickhoff,<br>(1981)        |
| -                                                                                              | 1.82E-03                                                                                      | -                                                                                        | 6.61E-02                                                                                  |                                     |                                                                           | 0.05*                                               | <b>3.30E-03</b>                                                                                                                | -                | -                                                 | Calculated<br>from<br>solubility   |                              |
| 2.11E-03                                                                                       | 1.78E-03                                                                                      | 1.30E-01                                                                                 | 6.00E-02                                                                                  |                                     |                                                                           | 0.05*                                               | <b>3.00E-03</b>                                                                                                                | Saturated        |                                                   | Literature                         |                              |
| -                                                                                              | 1.92E-03                                                                                      |                                                                                          | 8.30E-02                                                                                  |                                     |                                                                           | 0.05*                                               | <b>4.15E-03</b>                                                                                                                | -                | -                                                 | Measured                           | Kenaga, (1980)               |
| -                                                                                              | 1.85E-03                                                                                      |                                                                                          | 7.10E-02                                                                                  |                                     |                                                                           | 0.05*                                               | <b>3.55E-03</b>                                                                                                                | -                | -                                                 | Calculated                         |                              |
|                                                                                                | 2.02E-03                                                                                      |                                                                                          | 1.00                                                                                      |                                     |                                                                           | 0.001-<br>0.004                                     | <b>7E-05<br/>-<br/>4.2E-4</b>                                                                                                  | Saturated        | Sandy-<br>loam<br>contamin<br>ated with<br>(BTEX) | Measured                           | Mackay et al.,<br>(1996)     |
|                                                                                                | -1.10                                                                                         |                                                                                          | 0.079                                                                                     |                                     |                                                                           | 0.05*                                               | <b>3.95E-03</b>                                                                                                                | -                |                                                   | Literature                         | Wiedemeier et<br>al., (1996) |
|                                                                                                |                                                                                               |                                                                                          |                                                                                           |                                     |                                                                           | 0.05                                                | <b>2.86E-03</b>                                                                                                                | -                | Sandy<br>aquifer<br>materials                     | Measured                           | Baek et al.,<br>(2003)       |
|                                                                                                |                                                                                               |                                                                                          |                                                                                           | 1.11E+00                            | 2.00E-07                                                                  |                                                     |                                                                                                                                | -                | Sand                                              | Measured                           | Du et al., (2010)            |
|                                                                                                |                                                                                               |                                                                                          |                                                                                           | 1.08E+00                            | 2.30E-06                                                                  | 0.03                                                |                                                                                                                                | Unsaturated      | Fine                                              | Batch                              | English & Loehr,             |

|          |  |  |  |          |          |       |                                         |  |               |               |                         |
|----------|--|--|--|----------|----------|-------|-----------------------------------------|--|---------------|---------------|-------------------------|
|          |  |  |  |          |          |       |                                         |  | sandy loam    | sorption test | (1991)                  |
| 5.10E-04 |  |  |  |          |          |       | <b>5.10E-04</b>                         |  | Clay          | Measured      | Osagie & Owabor, (2015) |
|          |  |  |  | 1.11E+00 | 1.11E-03 |       |                                         |  |               |               | Donahue et al., (1999)  |
|          |  |  |  | 9.17E-01 | 4.88E-04 |       |                                         |  | Sand          | Literature    |                         |
|          |  |  |  |          |          |       | <b>3.33E-04</b><br>-<br><b>3.09E-02</b> |  | Various clays | Measured      |                         |
|          |  |  |  |          |          |       | <b>2.00E-04</b><br>-<br><b>2.23E-02</b> |  | Silty clay    |               |                         |
|          |  |  |  |          |          | 0.043 | <b>2.22E-03</b>                         |  | Clay          | Measured      | Redding et al., (2002)  |
|          |  |  |  |          |          | 0.075 | <b>8.39E-03</b>                         |  | Clay          |               |                         |
|          |  |  |  |          |          |       | <b>3.70E-05</b><br>-<br><b>4.6E-05</b>  |  | Clay          | Measured      | Karickhoff, (1981)      |

### S3. Sobol sample size

Basically, the calculation of the Sobol indices requires  $r(2k + 2)$  model simulations. An increase in the number of  $r$  will increase the accuracy of the Sobol indices. Since the number of  $r$  is somewhat arbitrary, convergence analysis of the Sobol indices would be the recommended procedure for estimating  $r$ . However, this approach is time-consuming because it needs to repeat the GSA multiple times by increasing the number of samples until the variability of the indices between two consecutive analyses is below a certain threshold value for all parameters. The literature reports a very wide range of sample sizes  $r$  used in hydrological models, from 7 to 75000 for a total of 300 to  $> 6 \times 10^6$  numerical simulations (Song et al., 2015). Wainwright et al. (2013) observed that the sensitivity indices stabilize at around  $r = 200$  to 250 (for five parameters). Nossent et al. (2011) used  $r = 12000$  in a study testing the suitability of the Sobol GSA for a complex environmental model (of 26 parameters). They reported that for most parameters,  $r < 5000$  was sufficient to reach a stable  $S_i$ . Brunetti et al. (2016) used  $r = 5000$  for a Sobol analysis that used Hydrus 1D model. Based on these observations, a value of  $r = 5000$  was chosen for this study.

### S4. The RBF approximation equations:

The RBF approximation is a weighted summation of  $n_a$  basis functions (and a polynomial or constant value) that can approximate the predictive response  $Y(x)$  at a point  $x_i$  as follows:

$$1. \quad Y(x) = \sum_{i=1}^{n_a} \omega_i f(\|x - x_i\|) = f(x)\omega$$

where  $f = \{f_1, f_2, \dots, f_{n_a}\}$  is the vector of the basis functions,  $\omega_i$  is the  $i^{\text{th}}$  component of the radial basis coefficient vector  $\omega = \{\omega_1, \omega_2, \dots, \omega_{n_a}\}^T$  and  $\|x - x_i\|$  is the Euclidian distance between two sample points.

There are various forms of basis functions; the most popular is the Gaussian kernel function:

$$2. \quad f(\|x - x_i\|) = \exp\left(\frac{\|x - x_i\|^2}{\varepsilon^2}\right)$$

where  $\varepsilon$  is the shape parameter which determines the spread of the kernel function  $f_i$ . The coefficient vector  $\omega$  can be obtained by enforcing the accurate interpolation condition, i.e.,

$$3. \quad \begin{bmatrix} y(x_1) \\ y(x_2) \\ \vdots \\ y(x_{n_a}) \end{bmatrix} = \begin{bmatrix} f(x_{11}) & f(x_{12}) & \dots & f(x_{1n_a}) \\ f(x_{21}) & f(x_{22}) & \dots & f(x_{2n_a}) \\ \vdots & \vdots & \ddots & \vdots \\ f(x_{n_a1}) & f(x_{n_a2}) & \dots & f(x_{n_an_a}) \end{bmatrix}$$

where  $f_{uv} = f(\|x_u - x_v\|)$ . In a matrix form, Equation 3 can be rewritten as  $Y_a = F\omega$ . This equation has a unique solution  $\omega = F^{-1}Y_a$  if and only if all the sample points are different from

each other. Therefore, the filled values for the remaining  $n_m$  locations, for which the model responses are missing due to simulation crashes, can be approximated by Equation 4:

$$4. \quad Y(x_i) = f(x_i)F^{-1}Y_a \quad (i = 1, 2, \dots, n_a)$$

In this study  $n_a$  was set to the number of non-missing sample points. The shape parameter  $\epsilon$  was changed from the default of the mean distance between neighboring nodes, to the average KNN of the response function, where  $k$  was set to five in the homogenous media and to a value of 2 in the heterogeneous media for higher sensitivity.

### S5. Morris homogenous sandy soil results:

Tables S3 and S4 present  $\mu^*$ ,  $\mu^*$  confidence interval and  $\sigma$  results of the Morris analysis in homogeneous media for the flux and concentration respectively, with different methods for missing data handling.

Table S3: Morris indices values of total benzene flux to the aquifer, indicating the different methods for missing parameter handling

| Method                    | Output value                      | Input parameter |        |       |            |       |             |        |
|---------------------------|-----------------------------------|-----------------|--------|-------|------------|-------|-------------|--------|
|                           |                                   | $\alpha$        | $n$    | $K_s$ | $\alpha_l$ | $k_d$ | $\lambda_k$ | $z$    |
| Zero replaced             | $\mu^*$                           | 1.001           | 3.080  | 0.444 | 0.043      | 1.941 | 6.791       | 4.461  |
|                           | $\mu^*$ confidence interval       | 0.756           | 1.160  | 0.181 | 0.017      | 0.812 | 2.000       | 1.679  |
|                           | $\sigma$                          | 5.675           | 10.343 | 1.595 | 0.143      | 6.253 | 16.472      | 13.494 |
| 5NN                       | $\mu^*$                           | 1.271           | 3.379  | 0.614 | 0.077      | 1.941 | 6.791       | 4.638  |
|                           | $\mu^*$ confidence interval       | 0.734           | 1.498  | 0.317 | 0.054      | 0.811 | 1.908       | 1.663  |
|                           | $\sigma$                          | 6.480           | 10.706 | 2.629 | 0.459      | 6.253 | 16.472      | 13.512 |
| 45NN                      | $\mu^*$                           | 1.161           | 3.399  | 0.587 | 0.057      | 1.941 | 6.793       | 4.737  |
|                           | $\mu^*$ confidence interval       | 0.697           | 1.406  | 0.271 | 0.026      | 0.658 | 1.882       | 1.946  |
|                           | $\sigma$                          | 5.843           | 10.445 | 2.056 | 0.193      | 6.253 | 16.472      | 13.531 |
| RBF                       | $\mu^*$                           | 1.288           | 4.269  | 0.787 | 0.153      | 1.973 | 6.850       | 5.305  |
|                           | $\mu^*$ confidence interval       | 0.727           | 1.502  | 0.416 | 0.152      | 0.723 | 1.998       | 1.944  |
|                           | $\sigma$                          | 6.052           | 13.149 | 3.564 | 1.237      | 6.249 | 16.458      | 15.322 |
| Full trajectories removed | $\mu^*$                           | 0.713           | 3.069  | 0.451 | 0.045      | 1.913 | 6.544       | 4.331  |
|                           | $\mu^*$ confidence interval       | 0.546           | 1.440  | 0.170 | 0.021      | 0.787 | 2.258       | 1.726  |
|                           | $\sigma$                          | 4.292           | 10.492 | 1.614 | 0.148      | 6.167 | 16.027      | 12.787 |
| Average                   | $\mu^*$                           | 1.087           | 3.439  | 0.576 | 0.075      | 1.941 | 6.754       | 4.694  |
|                           | $\mu^*$ STDEV                     | 0.238           | 0.490  | 0.141 | 0.046      | 0.021 | 0.120       | 0.376  |
|                           | $\mu^*$ confidence interval       | 0.692           | 1.401  | 0.271 | 0.054      | 0.758 | 2.009       | 1.792  |
|                           | $\mu^*$ confidence interval STDEV | 0.084           | 0.141  | 0.102 | 0.057      | 0.067 | 0.149       | 0.142  |
|                           | $\sigma$                          | 5.668           | 11.027 | 2.292 | 0.436      | 6.235 | 16.380      | 13.729 |
|                           | $\sigma$ STDEV                    | 0.826           | 1.194  | 0.827 | 0.466      | 0.038 | 0.198       | 0.944  |

Table S4: Morris indices values of final concentration of benzene in aquifer, indicating the different methods for missing parameter handling

| Method                    | Output value                      | Input parameter |        |        |            |        |             |        |
|---------------------------|-----------------------------------|-----------------|--------|--------|------------|--------|-------------|--------|
|                           |                                   | $\alpha$        | n      | $K_s$  | $\alpha_l$ | $k_d$  | $\Lambda_k$ | Z      |
| Zero replaced             | $\mu^*$                           | 0.0169          | 0.0894 | 0.0286 | 0.0040     | 0.1516 | 0.5540      | 0.2188 |
|                           | $\mu^*$ confidence interval       | 0.0230          | 0.0413 | 0.0142 | 0.0025     | 0.0643 | 0.1273      | 0.0755 |
|                           | $\sigma$                          | 0.1886          | 0.3897 | 0.1172 | 0.0217     | 0.4891 | 1.0351      | 0.6164 |
| 5NN                       | $\mu^*$                           | 0.0294          | 0.1004 | 0.0356 | 0.0060     | 0.1516 | 0.5540      | 0.2290 |
|                           | $\mu^*$ confidence interval       | 0.0258          | 0.0454 | 0.0168 | 0.0046     | 0.0635 | 0.1339      | 0.0740 |
|                           | $\sigma$                          | 0.2295          | 0.3880 | 0.1446 | 0.0314     | 0.4891 | 1.0351      | 0.6188 |
| 45NN                      | $\mu^*$                           | 0.0258          | 0.1049 | 0.0356 | 0.0048     | 0.1516 | 0.5542      | 0.2337 |
|                           | $\mu^*$ confidence interval       | 0.0242          | 0.0511 | 0.0148 | 0.0028     | 0.0631 | 0.1274      | 0.0728 |
|                           | $\sigma$                          | 0.1972          | 0.3846 | 0.1311 | 0.0230     | 0.4891 | 1.0350      | 0.6185 |
| RBF                       | $\mu^*$                           | 0.0189          | 0.1046 | 0.0306 | 0.0076     | 0.1545 | 0.5575      | 0.2536 |
|                           | $\mu^*$ confidence interval       | 0.0207          | 0.0606 | 0.0135 | 0.0054     | 0.0672 | 0.1270      | 0.0835 |
|                           | $\sigma$                          | 0.1972          | 0.3846 | 0.1311 | 0.0230     | 0.4891 | 1.0350      | 0.6185 |
| Full trajectories removed | $\mu^*$                           | 0.0046          | 0.0865 | 0.0300 | 0.0041     | 0.1511 | 0.5416      | 0.2195 |
|                           | $\mu^*$ confidence interval       | 0.0030          | 0.0465 | 0.0184 | 0.0031     | 0.0636 | 0.1198      | 0.0789 |
|                           | $\sigma$                          | 0.0241          | 0.3702 | 0.1216 | 0.0225     | 0.4892 | 1.0207      | 0.6095 |
| Average                   | $\mu^*$                           | 0.019           | 0.097  | 0.032  | 0.005      | 0.152  | 0.552       | 0.231  |
|                           | $\mu^*$ STDEV                     | 0.010           | 0.009  | 0.003  | 0.002      | 0.001  | 0.006       | 0.014  |
|                           | $\mu^*$ confidence interval       | 0.019           | 0.049  | 0.016  | 0.004      | 0.064  | 0.127       | 0.077  |
|                           | $\mu^*$ confidence interval STDEV | 0.009           | 0.007  | 0.002  | 0.001      | 0.002  | 0.005       | 0.004  |
|                           | $\sigma$                          | 0.167           | 0.383  | 0.129  | 0.024      | 0.489  | 1.032       | 0.616  |
|                           | $\sigma$ STDEV                    | 0.082           | 0.008  | 0.011  | 0.004      | 0.000  | 0.006       | 0.004  |

### S6. Sobol homogenous sandy soil results:

Tables S5 and S6 present first order results of Sobol indices values determined by the Sobol analysis in homogeneous media for benzene total flux and final concentration in the aquifer, respectively, with the different methods for missing data imputation.

Table S5: First order Sobol indices values for benzene total flux to the aquifer with the different methods for missing parameter handling:

| Method        | Output value                             | Input parameter |                |                |         |
|---------------|------------------------------------------|-----------------|----------------|----------------|---------|
|               |                                          | n               | k <sub>d</sub> | λ <sub>k</sub> | z       |
| Zero replaced | S <sub>1</sub>                           | 0.003           | 0.001          | 0.107          | 0.019   |
|               | S <sub>1</sub> confidence interval       | 0.001           | 0.001          | 0.014          | 0.005   |
| 5 KNN         | S <sub>1</sub>                           | 0.003           | 0.001          | 0.111          | 0.021   |
|               | S <sub>1</sub> confidence interval       | 0.001           | 0.001          | 0.015          | 0.005   |
| 233 KNN       | S <sub>1</sub>                           | 0.003           | 0.001          | 0.109          | 0.022   |
|               | S <sub>1</sub> confidence interval       | 0.001           | 0.001          | 0.013          | 0.005   |
| RBF           | S <sub>1</sub>                           | 0.002           | 0.001          | 0.135          | 0.012   |
|               | S <sub>1</sub> confidence interval       | 0.001           | 0.001          | 0.017          | 0.003   |
| Average       | S <sub>1</sub>                           | 0.003           | 0.001          | 0.115          | 0.018   |
|               | STDEV S <sub>1</sub>                     | 0.00049         | 0.00012        | 0.01307        | 0.00453 |
|               | S <sub>1</sub> confidence interval       | 0.001           | 0.001          | 0.015          | 0.005   |
|               | STDEV S <sub>1</sub> confidence interval | 0.00022         | 0.00006        | 0.00173        | 0.00130 |

Table S6: First order Sobol indices values for final concentration of benzene in the aquifer with the different methods for missing parameter handling:

| Method        | Output value                             | Input parameter |                |                |         |
|---------------|------------------------------------------|-----------------|----------------|----------------|---------|
|               |                                          | n               | k <sub>d</sub> | λ <sub>k</sub> | z       |
| Zero replaced | S <sub>1</sub>                           | 0.002           | 0.001          | 0.130          | 0.011   |
|               | S <sub>1</sub> confidence interval       | 0.001           | 0.001          | 0.014          | 0.003   |
| 5 KNN         | S <sub>1</sub>                           | 0.002           | 0.001          | 0.133          | 0.012   |
|               | S <sub>1</sub> confidence interval       | 0.001           | 0.001          | 0.014          | 0.003   |
| 233 KNN       | S <sub>1</sub>                           | 0.002           | 0.001          | 0.131          | 0.012   |
|               | S <sub>1</sub> confidence interval       | 0.001           | 0.001          | 0.013          | 0.003   |
| RBF           | S <sub>1</sub>                           | 0.002           | 0.001          | 0.135          | 0.012   |
|               | S <sub>1</sub> confidence interval       | 0.001           | 0.001          | 0.017          | 0.003   |
| Average       | S <sub>1</sub>                           | 0.002           | 0.001          | 0.132          | 0.012   |
|               | STDEV S <sub>1</sub>                     | 0.00009         | 0.00006        | 0.00233        | 0.00057 |
|               | S <sub>1</sub> confidence interval       | 0.001           | 0.001          | 0.015          | 0.003   |
|               | STDEV S <sub>1</sub> confidence interval | 0.00009         | 0.00005        | 0.00147        | 0.00016 |



Tables S7 and S8 present total Sobol indices values of the Sobol analysis in homogeneous media for benzene total flux and final concentration in the aquifer respectively, with the different methods for missing data imputation.

Table S7: Total Sobol indices values for benzene total flux to the aquifer with the different methods for missing parameter handling:

| Method        | Output value                    | Input parameter |         |             |         |
|---------------|---------------------------------|-----------------|---------|-------------|---------|
|               |                                 | n               | $k_d$   | $\lambda_k$ | z       |
| Zero replaced | $S_T$                           | 0.226           | 0.107   | 1.046       | 0.781   |
|               | $S_T$ confidence interval       | 0.160           | 0.095   | 0.463       | 0.421   |
| 5 KNN         | $S_T$                           | 0.215           | 0.105   | 1.047       | 0.785   |
|               | $S_T$ confidence interval       | 0.208           | 0.104   | 0.588       | 0.409   |
| 233 KNN       | $S_T$                           | 0.219           | 0.106   | 1.045       | 0.782   |
|               | $S_T$ confidence interval       | 0.178           | 0.107   | 0.599       | 0.450   |
| RBF           | $S_T$                           | 0.225           | 0.105   | 1.046       | 0.776   |
|               | $S_T$ confidence interval       | 0.189           | 0.114   | 0.573       | 0.459   |
| Average       | $S_T$                           | 0.221           | 0.106   | 1.046       | 0.781   |
|               | STDEV $S_T$                     | 0.00534         | 0.00065 | 0.00095     | 0.00360 |
|               | ST confidence interval          | 0.184           | 0.105   | 0.556       | 0.435   |
|               | STDEV $S_T$ confidence interval | 0.02029         | 0.00788 | 0.06268     | 0.02372 |

Table S8: Total Sobol indices values for benzene final concentration in the aquifer with the different methods for missing parameter handling:

| Method        | Output value                    | Input parameter |         |             |         |
|---------------|---------------------------------|-----------------|---------|-------------|---------|
|               |                                 | n               | $k_d$   | $\lambda_k$ | z       |
| Zero replaced | $S_T$                           | 0.173           | 0.087   | 1.204       | 0.583   |
|               | $S_T$ confidence interval       | 0.121           | 0.084   | 0.585       | 0.346   |
| 5 KNN         | $S_T$                           | 0.164           | 0.086   | 1.202       | 0.588   |
|               | $S_T$ confidence interval       | 0.136           | 0.087   | 0.635       | 0.355   |
| 233 KNN       | $S_T$                           | 0.168           | 0.087   | 1.203       | 0.583   |
|               | $S_T$ confidence interval       | 0.101           | 0.075   | 0.499       | 0.304   |
| RBF           | $S_T$                           | 0.164           | 0.086   | 1.200       | 0.581   |
|               | $S_T$ confidence interval       | 0.110           | 0.091   | 0.489       | 0.312   |
| Average       | $S_T$                           | 0.167           | 0.087   | 1.202       | 0.584   |
|               | STDEV $S_T$                     | 0.00415         | 0.00055 | 0.00162     | 0.00301 |
|               | ST confidence interval          | 0.117           | 0.084   | 0.552       | 0.329   |
|               | STDEV $S_T$ confidence interval | 0.01500         | 0.00672 | 0.07055     | 0.02498 |

**S7. Morris analysis for heterogeneous media**  
**a. Clay layer characterization**

Table S9 presents overall hydraulic conductivities and soil types of the different soil categories used for characterization of field site clay layers and Table S10 presents an example from one such site.

Table S9: Soil type characterization according to hydraulic conductivities values:

| Category           | Name             | Soil type           | K (m/day) | Source                                 |
|--------------------|------------------|---------------------|-----------|----------------------------------------|
| <b>Gravel</b>      | gravel           | gravel              | 8640      | Bear (1972)                            |
|                    | gravel sand      | sandy gravel        |           |                                        |
| <b>Sand</b>        | sand             | sand                | 7.128     | Carsel & Parrish (1988)                |
|                    | sand gravel      | gravely sand        | 7.128     |                                        |
|                    | kurkar sand      |                     | 7.128     |                                        |
|                    | filling sub      |                     | 7.128     |                                        |
|                    | sand silt        | silty sand          | 3.502     | Carsel & Parrish (1988)                |
|                    | silt sand        | sandy silt          | 1.061     | Carsel & Parrish (1988)                |
| <b>Clayey Sand</b> | sand clay        | clayey sand         | 0.1888    | Rosetta assuming 55% sand and 45% clay |
|                    | sand with clay   |                     | 0.1888    |                                        |
|                    | sand clay gravel | clayey gravely sand | 0.1888    |                                        |
| <b>Clay</b>        | silt             | silt                | 0.06      | Carsel & Parrish (1988)                |
|                    | clay             | clay                | 0.048     | Carsel & Parrish (1988)                |
|                    | limestone        | limestone           | 8.64E-06  | Bear (1972)                            |
|                    | clay sand        | sandy clay          | 0.0288    | Carsel & Parrish (1988)                |
|                    | clay silt        | silty clay          | 0.0048    | Carsel & Parrish (1988)                |
|                    | gravel sand clay | gravely sandy clay  | 0.0288    |                                        |

Table S10: Example of clay layers data extraction from one site

| Data received  |              |                       |                              |          |                     | Data extrapolated |          |                       |                                  |
|----------------|--------------|-----------------------|------------------------------|----------|---------------------|-------------------|----------|-----------------------|----------------------------------|
| From depth (m) | To depth (m) | Sand /sand-gravel (%) | Sand clay/ clayey sand (%)** | Clay (%) | Number of boreholes | Sand (%)          | Clay (%) | Thickness of clay (m) | Overall clay layer thickness (m) |
| 1              | 3            | 33%                   | 0%                           | 67%      | 3                   | 33.3%             | 67%      | 2                     | 3.5                              |
|                | 4            | 0%                    | 50%                          | 50%      | 3                   | 27.5%             | 73%      | 1                     |                                  |
|                | 5            | 25%                   | 50%                          | 25%      | 2                   | 52.5%             | 48%      | 0.5                   |                                  |
|                | 5.5          | 100%                  | 0%                           | 0%       | 4                   | 100.0%            | 0%       | 1                     |                                  |
|                | 6.5          | 0%                    | 0%                           | 100%     | 2                   | 0.0%              | 100%     | 0.5                   | 4                                |
|                | 7            | 0%                    | 0%                           | 100%     | 2                   | 0.0%              | 100%     | 2                     |                                  |
|                | 9            | 0%                    | 67%                          | 33%      | 1                   | 0.0%              | 100%     | 1                     |                                  |
|                | 10           | 0%                    | 0%                           | 100%     | 2                   | 36.7%             | 63%      | 0.5                   |                                  |
| 10.5           | 11           | 100%                  | 0%                           | 0%       | 1                   | 100.0%            | 0%       | 0.5                   |                                  |
|                | 11.5         | 0%                    | 100%                         | 0%       | 1                   | 55.0%             | 45%      | 0.5                   | 1                                |
|                | 12           | 50%                   | 0%                           | 50%      | 3                   | 50.0%             | 50%      | 0.5                   |                                  |
|                | 12.5         | 100%                  | 0%                           | 0%       | 1                   | 100.0%            | 0%       |                       |                                  |

\*Other sites also contained other soil types \*\*Sand clay and clayey sand soil were classified as 55% sand and 45% clay (Table S10) according to Rosetta (Schaap et al., 2001).

## b. Morris analysis results

Tables S11 and S12 present  $\mu^*$ ,  $\mu^*$  confidence interval and  $\sigma$  results of the Morris analysis in heterogeneous media for benzene total flux to the aquifer and final concentration in the aquifer respectively, with the different methods for missing data handling.

Table S11: Morris indices values of benzene flux to the aquifer for heterogeneous media received with the different methods for missing parameter handling

| Method                    | Output value                | Input parameter |            |       |       |          |          |               |               |          |          |                |                |       |       |       |
|---------------------------|-----------------------------|-----------------|------------|-------|-------|----------|----------|---------------|---------------|----------|----------|----------------|----------------|-------|-------|-------|
|                           |                             | $\alpha_1$      | $\alpha_2$ | $n_1$ | $n_2$ | $K_{s1}$ | $K_{s2}$ | $\alpha_{i1}$ | $\alpha_{i2}$ | $k_{d1}$ | $k_{d2}$ | $\lambda_{k1}$ | $\lambda_{k2}$ | $z$   | $N$   | $b$   |
| Zero replaced             | $\mu^*$                     | 0.026           | 0.093      | 0.138 | 0.312 | 0.038    | 0.220    | 0.001         | 0.016         | 0.123    | 0.875    | 0.289          | 1.127          | 0.035 | 0.016 | 0.420 |
|                           | $\mu^*$ confidence interval | 0.051           | 0.101      | 0.150 | 0.573 | 0.038    | 0.371    | 0.001         | 0.019         | 0.142    | 0.875    | 0.457          | 0.788          | 0.042 | 0.024 | 0.489 |
|                           | $\sigma$                    | 0.410           | 0.841      | 1.187 | 4.574 | 0.330    | 3.330    | 0.010         | 0.165         | 1.008    | 6.648    | 3.407          | 7.072          | 0.407 | 0.180 | 3.949 |
| 5NN                       | $\mu^*$                     | 0.026           | 0.200      | 0.182 | 0.222 | 0.029    | 0.068    | 0.001         | 0.016         | 0.123    | 0.875    | 0.289          | 1.127          | 0.161 | 0.016 | 0.238 |
|                           | $\mu^*$ confidence interval | 0.042           | 0.222      | 0.149 | 0.403 | 0.039    | 0.101    | 0.001         | 0.021         | 0.133    | 0.860    | 0.384          | 0.819          | 0.222 | 0.020 | 0.256 |
|                           | $\sigma$                    | 0.410           | 1.936      | 1.221 | 3.154 | 0.282    | 0.842    | 0.010         | 0.165         | 1.008    | 6.648    | 3.407          | 7.072          | 1.800 | 0.180 | 2.192 |
| 63NN                      | $\mu^*$                     | 0.063           | 0.186      | 0.234 | 0.273 | 0.041    | 0.147    | 0.006         | 0.020         | 0.127    | 0.878    | 0.294          | 1.129          | 0.141 | 0.034 | 0.294 |
|                           | $\mu^*$ confidence interval | 0.060           | 0.165      | 0.148 | 0.480 | 0.035    | 0.180    | 0.005         | 0.020         | 0.120    | 0.768    | 0.442          | 0.949          | 0.154 | 0.025 | 0.344 |
|                           | $\sigma$                    | 0.459           | 1.419      | 1.230 | 3.834 | 0.297    | 1.419    | 0.036         | 0.170         | 1.008    | 6.648    | 3.408          | 7.072          | 1.221 | 0.220 | 2.487 |
| RBF                       | $\mu^*$                     | 1.296           | 0.612      | 1.189 | 0.926 | 0.129    | 0.113    | 0.627         | 0.037         | 0.235    | 1.305    | 0.611          | 1.639          | 1.254 | 0.512 | 0.571 |
|                           | $\mu^*$ confidence interval | 0.624           | 0.322      | 0.460 | 0.462 | 0.072    | 0.036    | 0.338         | 0.026         | 0.167    | 0.832    | 0.499          | 0.929          | 0.505 | 0.245 | 0.286 |
|                           | $\sigma$                    | 5.141           | 2.499      | 3.938 | 4.004 | 0.574    | 0.307    | 2.727         | 0.190         | 1.186    | 6.996    | 4.284          | 7.414          | 4.222 | 1.982 | 2.693 |
| Full trajectories removed | $\mu^*$                     | 0.061           | 0.095      | 0.199 | 0.718 | 0.058    | 0.000    | 0.000         | 0.023         | 0.164    | 1.142    | 0.595          | 1.707          | 0.058 | 0.022 | 0.479 |
|                           | $\mu^*$ confidence interval | 0.111           | 0.117      | 0.290 | 1.437 | 0.084    | 0.000    | 0.001         | 0.037         | 0.212    | 1.441    | 0.928          | 1.549          | 0.121 | 0.045 | 0.591 |

|                |                                           |       |       |       |       |       |       |       |       |       |       |       |       |       |       |       |
|----------------|-------------------------------------------|-------|-------|-------|-------|-------|-------|-------|-------|-------|-------|-------|-------|-------|-------|-------|
|                | $\sigma$                                  | 0.629 | 0.622 | 1.602 | 7.025 | 0.430 | 0.000 | 0.002 | 0.216 | 1.050 | 7.886 | 5.204 | 8.724 | 0.580 | 0.223 | 3.150 |
| <b>Average</b> | $\mu^*$                                   | 0.295 | 0.237 | 0.388 | 0.490 | 0.059 | 0.109 | 0.127 | 0.022 | 0.154 | 1.015 | 0.416 | 1.346 | 0.330 | 0.120 | 0.400 |
|                | $\mu^*$ STDE                              | 0.560 | 0.215 | 0.449 | 0.314 | 0.041 | 0.083 | 0.280 | 0.008 | 0.048 | 0.199 | 0.171 | 0.300 | 0.520 | 0.219 | 0.136 |
|                | $\mu^*$<br>confidence<br>interval         | 0.178 | 0.185 | 0.239 | 0.671 | 0.054 | 0.138 | 0.069 | 0.025 | 0.155 | 0.955 | 0.542 | 1.007 | 0.209 | 0.072 | 0.393 |
|                | $\mu^*$<br>confidence<br>interval<br>STDE | 0.251 | 0.090 | 0.138 | 0.432 | 0.023 | 0.147 | 0.151 | 0.008 | 0.036 | 0.275 | 0.220 | 0.311 | 0.178 | 0.097 | 0.142 |
|                | $\sigma$                                  | 1.410 | 1.463 | 1.835 | 4.518 | 0.382 | 1.180 | 0.557 | 0.181 | 1.052 | 6.965 | 3.942 | 7.471 | 1.646 | 0.557 | 2.894 |
|                | $\sigma$ STDE                             | 2.088 | 0.774 | 1.187 | 1.490 | 0.121 | 1.318 | 1.213 | 0.022 | 0.077 | 0.536 | 0.801 | 0.716 | 1.542 | 0.797 | 0.685 |

Table S12: Morris indices values for benzene final concentration in the aquifer in heterogeneous media received with the different methods for missing parameter handling

| Method                    | Output value                   | Input parameter |            |       |       |          |          |               |               |          |          |                |                |       |       |       |
|---------------------------|--------------------------------|-----------------|------------|-------|-------|----------|----------|---------------|---------------|----------|----------|----------------|----------------|-------|-------|-------|
|                           |                                | $\alpha_1$      | $\alpha_2$ | $n_1$ | $n_2$ | $K_{s1}$ | $K_{s2}$ | $\alpha_{l1}$ | $\alpha_{l2}$ | $k_{d1}$ | $k_{d2}$ | $\lambda_{k1}$ | $\lambda_{k2}$ | $z$   | $N$   | $b$   |
| Zero replaced             | $\mu^*$                        | 0.000           | 0.008      | 0.009 | 0.013 | 0.005    | 0.014    | 0.000         | 0.001         | 0.022    | 0.064    | 0.017          | 0.077          | 0.012 | 0.003 | 0.029 |
|                           | $\mu^*$<br>confidence interval | 0.000           | 0.007      | 0.010 | 0.022 | 0.007    | 0.019    | 0.000         | 0.001         | 0.020    | 0.048    | 0.015          | 0.049          | 0.015 | 0.004 | 0.026 |
|                           | $\sigma$                       | 0.002           | 0.057      | 0.081 | 0.172 | 0.060    | 0.171    | 0.001         | 0.005         | 0.173    | 0.387    | 0.129          | 0.411          | 0.129 | 0.035 | 0.234 |
| 5NN                       | $\mu^*$                        | 0.000           | 0.013      | 0.019 | 0.010 | 0.002    | 0.007    | 0.000         | 0.001         | 0.022    | 0.064    | 0.017          | 0.077          | 0.020 | 0.003 | 0.018 |
|                           | $\mu^*$<br>confidence interval | 0.000           | 0.014      | 0.013 | 0.015 | 0.002    | 0.009    | 0.000         | 0.001         | 0.021    | 0.044    | 0.014          | 0.049          | 0.019 | 0.005 | 0.019 |
|                           | $\sigma$                       | 0.002           | 0.103      | 0.116 | 0.120 | 0.015    | 0.068    | 0.001         | 0.005         | 0.173    | 0.387    | 0.129          | 0.411          | 0.157 | 0.035 | 0.159 |
| 63NN                      | $\mu^*$                        | 0.003           | 0.013      | 0.019 | 0.012 | 0.003    | 0.011    | 0.000         | 0.001         | 0.022    | 0.064    | 0.018          | 0.078          | 0.019 | 0.004 | 0.022 |
|                           | $\mu^*$<br>confidence interval | 0.002           | 0.009      | 0.009 | 0.017 | 0.003    | 0.009    | 0.000         | 0.001         | 0.023    | 0.052    | 0.016          | 0.047          | 0.019 | 0.004 | 0.022 |
|                           | $\sigma$                       | 0.012           | 0.080      | 0.083 | 0.145 | 0.020    | 0.081    | 0.003         | 0.005         | 0.173    | 0.387    | 0.129          | 0.411          | 0.141 | 0.036 | 0.171 |
| RBF                       | $\mu^*$                        | 0.074           | 0.037      | 0.084 | 0.058 | 0.006    | 0.009    | 0.046         | 0.002         | 0.042    | 0.094    | 0.029          | 0.115          | 0.096 | 0.040 | 0.042 |
|                           | $\mu^*$<br>confidence interval | 0.032           | 0.014      | 0.030 | 0.024 | 0.003    | 0.003    | 0.022         | 0.001         | 0.025    | 0.053    | 0.018          | 0.054          | 0.036 | 0.016 | 0.024 |
|                           | $\sigma$                       | 0.263           | 0.121      | 0.262 | 0.217 | 0.024    | 0.022    | 0.196         | 0.007         | 0.204    | 0.419    | 0.143          | 0.438          | 0.328 | 0.139 | 0.191 |
| Full trajectories removed | $\mu^*$                        | 0.000           | 0.013      | 0.005 | 0.029 | 0.002    | 0.000    | 0.000         | 0.001         | 0.031    | 0.074    | 0.030          | 0.124          | 0.015 | 0.005 | 0.042 |
|                           | $\mu^*$<br>confidence interval | 0.000           | 0.015      | 0.008 | 0.048 | 0.003    | 0.000    | 0.000         | 0.001         | 0.034    | 0.079    | 0.034          | 0.088          | 0.025 | 0.011 | 0.043 |
|                           | $\sigma$                       | 0.000           | 0.078      | 0.046 | 0.264 | 0.014    | 0.000    | 0.000         | 0.007         | 0.192    | 0.399    | 0.187          | 0.512          | 0.148 | 0.050 | 0.252 |
| Average                   | $\mu^*$                        | 0.015           | 0.017      | 0.027 | 0.024 | 0.004    | 0.008    | 0.009         | 0.001         | 0.028    | 0.072    | 0.022          | 0.094          | 0.032 | 0.011 | 0.030 |
|                           | $\mu^*$ STDE                   | 0.033           | 0.012      | 0.032 | 0.020 | 0.002    | 0.005    | 0.021         | 0.000         | 0.009    | 0.013    | 0.007          | 0.023          | 0.036 | 0.016 | 0.011 |
|                           | $\mu^*$<br>confidence interval | 0.007           | 0.012      | 0.014 | 0.025 | 0.003    | 0.008    | 0.004         | 0.001         | 0.025    | 0.055    | 0.020          | 0.057          | 0.023 | 0.008 | 0.027 |

|  |                                           |       |       |       |       |       |       |       |       |       |       |       |       |       |       |       |
|--|-------------------------------------------|-------|-------|-------|-------|-------|-------|-------|-------|-------|-------|-------|-------|-------|-------|-------|
|  | $\mu^*$<br>confidence<br>interval<br>STDE | 0.014 | 0.003 | 0.009 | 0.013 | 0.002 | 0.008 | 0.010 | 0.000 | 0.006 | 0.014 | 0.009 | 0.017 | 0.008 | 0.005 | 0.010 |
|  | $\sigma$                                  | 0.056 | 0.088 | 0.117 | 0.183 | 0.027 | 0.068 | 0.040 | 0.006 | 0.183 | 0.396 | 0.144 | 0.437 | 0.180 | 0.059 | 0.201 |
|  | $\sigma$ STDE                             | 0.116 | 0.025 | 0.084 | 0.058 | 0.019 | 0.066 | 0.087 | 0.001 | 0.015 | 0.014 | 0.025 | 0.044 | 0.083 | 0.045 | 0.040 |

Figure S1 presents fuel facilities distribution and the state of contamination on site in Israel (Reshef and Gal, 2017).

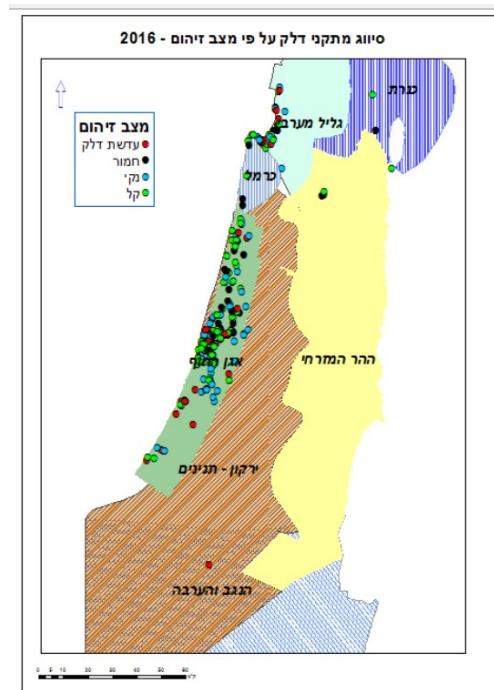

Figure S1 – Fuel facilities distribution and the state of groundwater contamination in circles (red – fuel plume, black – severe contamination, blue – clean, green – minor contamination).



Figure S2 presents the ratio of  $\mu^*$  confidence interval to  $\mu^*$  values. The RBF method for missing data imputation performed better than the other method tested.

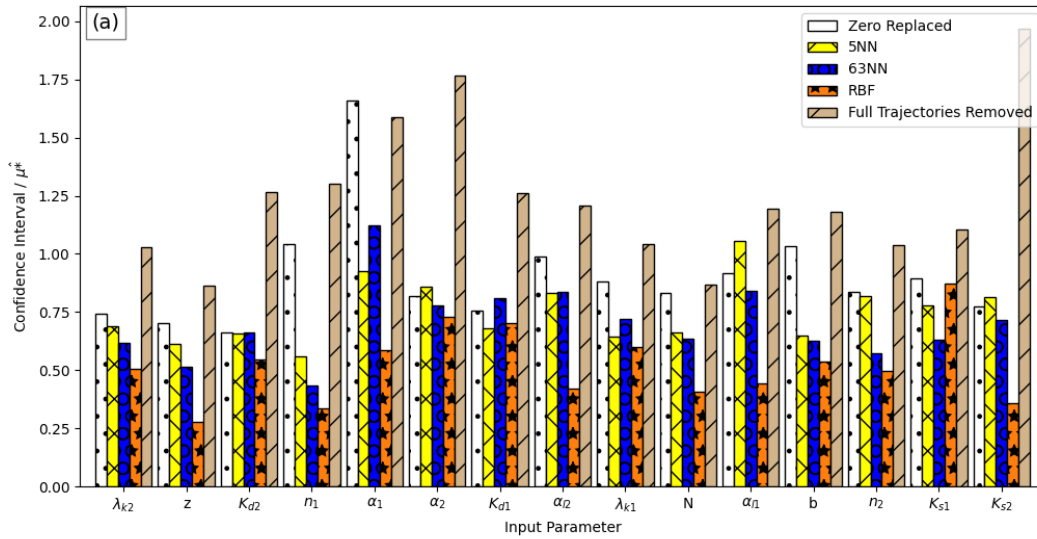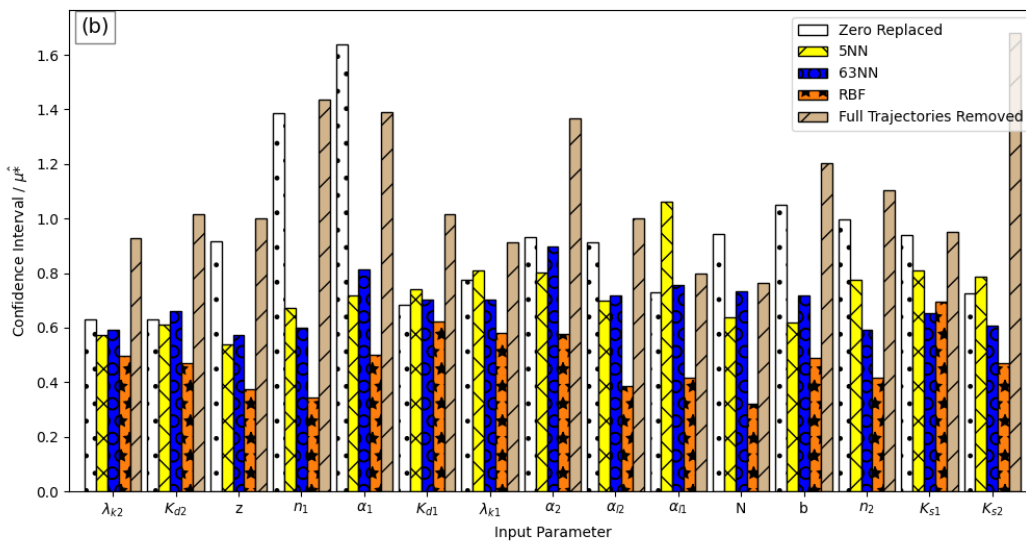

**Figure S2 – Morris analysis results for heterogeneous media of the confidence interval to  $\mu^*$  ratio for: a. benzene flux to the aquifer; and b. final benzene concentration in the aquifer.**

## References

- Baek, D. S., Kim, S. B., and Kim, D. J.: Irreversible sorption of benzene in sandy aquifer materials, *Hydrol. Process.*, 17, 1239–1251, <https://doi.org/10.1002/hyp.1181>, 2003.
- Bear, J.: *Dynamics of Fluids in Porous Media*, Dover Publications., 1972.
- Berlin, M., Vasudevan, M., Kumar, G. S., and Nambi, I. M.: Numerical modelling on fate and transport of coupled adsorption and biodegradation of pesticides in an unsaturated porous medium, *ISH J. Hydraul. Eng.*, 22, 236–246, <https://doi.org/10.1080/09715010.2016.1166073>, 2016.
- Brunetti, G., Šimůnek, J., and Piro, P.: A comprehensive numerical analysis of the hydraulic behavior of a permeable pavement, *J. Hydrol.*, 540, 1146–1161, <https://doi.org/10.1016/j.jhydrol.2016.07.030>, 2016.
- Carsel, R. F. F. and Parrish, R. S.: Developing joint probability distributions of soil waterretention characteristics., *Water Resour. Res.*, 24, 755–769, <https://doi.org/10.1029/88WR01772>., 1988.
- DeVaull, G. E., Ettinger R. A., Salanitro J. P., and B., G. J.: Degradation in vadose zone soils during vapor transport: first-order rate constants, in: *Petroleum Hydrocarbons and Organic Chemicals in Ground Water -- Prevention, Detection, and Remediation Conference*, 1997.
- Donahue, R. B., Barbour, S. L., and Headley, J. V.: Diffusion and adsorption of benzene in Regina clay, *Can. Geotech. J.*, 36, 430–442, <https://doi.org/10.1139/cgj-36-3-430>, 1999.
- Du, P., Sagehashi, M., Terada, A., and Hosomi, M.: Numerical modeling of benzene transport in andosol and sand: Adequacy of diffusion and equilibrium adsorption equations, *World Acad. Sci. Eng. Technol.*, 66, 38–42, <https://doi.org/10.5281/zenodo.1330975>, 2010.
- English, C. W. and Loehr, R. C.: Degradation of organic vapors in unsaturated soils, *J. Hazard. Mater.*, 28, 55–64, [https://doi.org/10.1016/0304-3894\(91\)87005-M](https://doi.org/10.1016/0304-3894(91)87005-M), 1991.
- Hers, I., Atwater, J., Li, L., and Zapf-Gilje, R.: Evaluation of vadose zone biodegradation of BTX vapours, *J. Contam. Hydrol.*, 46, 233–264, [https://doi.org/10.1016/S0169-7722\(00\)00135-2](https://doi.org/10.1016/S0169-7722(00)00135-2), 2000.
- Karickhoff, S. W.: Semi-empirical estimation of sorption of hydrophobic pollutants on natural sediments and soils., *Chemosphere*, 10, 833–846, 1981.
- Kenaga, E. E.: Predicted bioconcentration factors and soil sorption coefficients of pesticides and other chemicals, *Ecotoxicol. Environ. Saf.*, 4, 26–38, [https://doi.org/10.1016/0147-6513\(80\)90005-6](https://doi.org/10.1016/0147-6513(80)90005-6), 1980.
- Lahvis, M. A., Baehr, A. L., and Baker, R. J.: Quantification of aerobic biodegradation and volatilization rates of gasoline hydrocarbons near the water table under natural attenuation conditions, *Water Resour. Res.*, 35, 753–765, <https://doi.org/10.1029/1998WR900087>, 1999.
- Mackay, A. A., Chin, Y. P., Macfarlane, J. K., and Gschwend, P. M.: Laboratory assessment of BTEX soil flushing, *Environ. Sci. Technol.*, 30, 3223–3231, <https://doi.org/10.1021/es950963b>, 1996.
- Nossent, J., Elsen, P., and Bauwens, W.: Sobol' sensitivity analysis of a complex environmental

model, *Environ. Model. Softw.*, 26, 1515–1525, <https://doi.org/10.1016/j.envsoft.2011.08.010>, 2011.

Osagie, E. and Owabor, C. N.: Adsorption of benzene in batch system in natural clay and sandy soil, *Adv. Chem. Eng. Sci.*, 05, 352–361, <https://doi.org/10.4236/aces.2015.53037>, 2015.

Redding, A. Z., Burns, S. E., Upson, R. T., and Anderson, E. F.: Organoclay sorption of benzene as a function of total organic carbon content, *J. Colloid Interface Sci.*, 250, 261–264, <https://doi.org/10.1006/jcis.2001.8205>, 2002.

Reshef, G. and Gal, H.: Summary of actions to prevent pollution of water sources from fuels 2016, 2017.

Ririe, T. and Sweeney, R.: Fate and transport of volatile hydrocarbons in the vadose zone., in: 1995 Petroleum Hydrocarbon and Organic Chemicals in Groundwater, 529–542, 1995.

Schaap, M. G., Leij, F. J., and Van Genuchten, M. T.: Rosetta: A computer program for estimating soil hydraulic parameters with hierarchical pedotransfer functions, *J. Hydrol.*, 251, 163–176, [https://doi.org/10.1016/S0022-1694\(01\)00466-8](https://doi.org/10.1016/S0022-1694(01)00466-8), 2001.

Song, X., Zhang, J., Zhan, C., Xuan, Y., Ye, M., and Xu, C.: Global sensitivity analysis in hydrological modeling: Review of concepts, methods, theoretical framework, and applications, *J. Hydrol.*, 523, 739–757, <https://doi.org/10.1016/j.jhydrol.2015.02.013>, 2015.

Wainwright, H. M., Finsterle, S., Zhou, Q., and Birkholzer, J. T.: Modeling the performance of large-scale CO<sub>2</sub> storage systems: A comparison of different sensitivity analysis methods, *Int. J. Greenh. Gas Control*, 17, 189–205, <https://doi.org/10.1016/j.ijggc.2013.05.007>, 2013.

Wiedemeier, T. H., Swanson, M. A., Wilson, J. T., Kampbell, D. H., Miller, R. N., and Hansen, J. E.: Approximation of biodegradation rate constants for monoaromatic hydrocarbons (BTEX) in ground water, *Gr. Water Monit. Remediat.*, 16, 186–194, <https://doi.org/10.1111/j.1745-6592.1996.tb00149.x>, 1996.
